# Supplementary material
Source: PubMed Central journal article supplement (PMC7794197)
Supplement: ONCO-26-e153-s001.pdf [file ONCO-26-e153-s001.pdf]

Supplemental Figures for:  
 Targetable BRAF and RAF1 alterations in advanced pediatric cancers  
 Andrew Rankin et al.

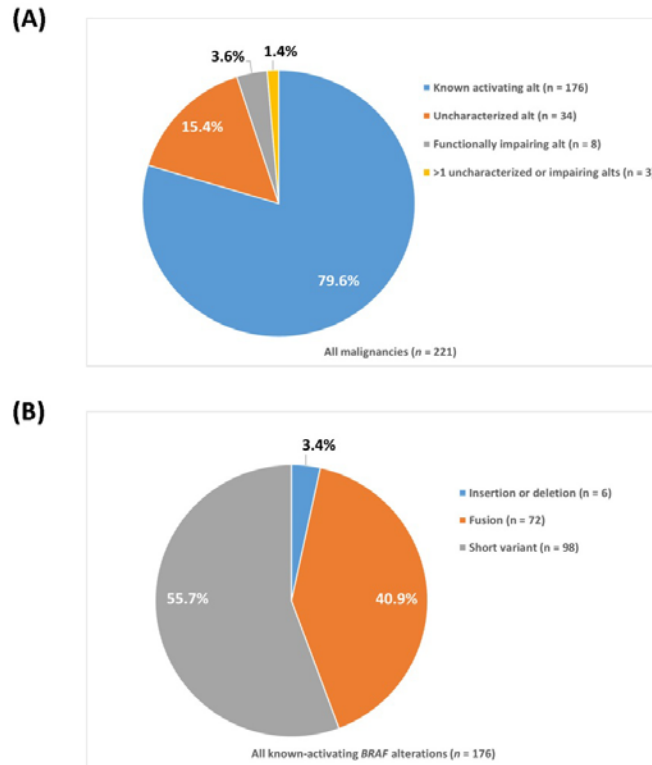

**Figure S1.** Distribution of *BRAF* alteration types in pediatric cancers according to known functional status **(A)**, and by alteration type within the cohort bearing a known-activating alteration **(B)**. Abbreviations: alt, alteration

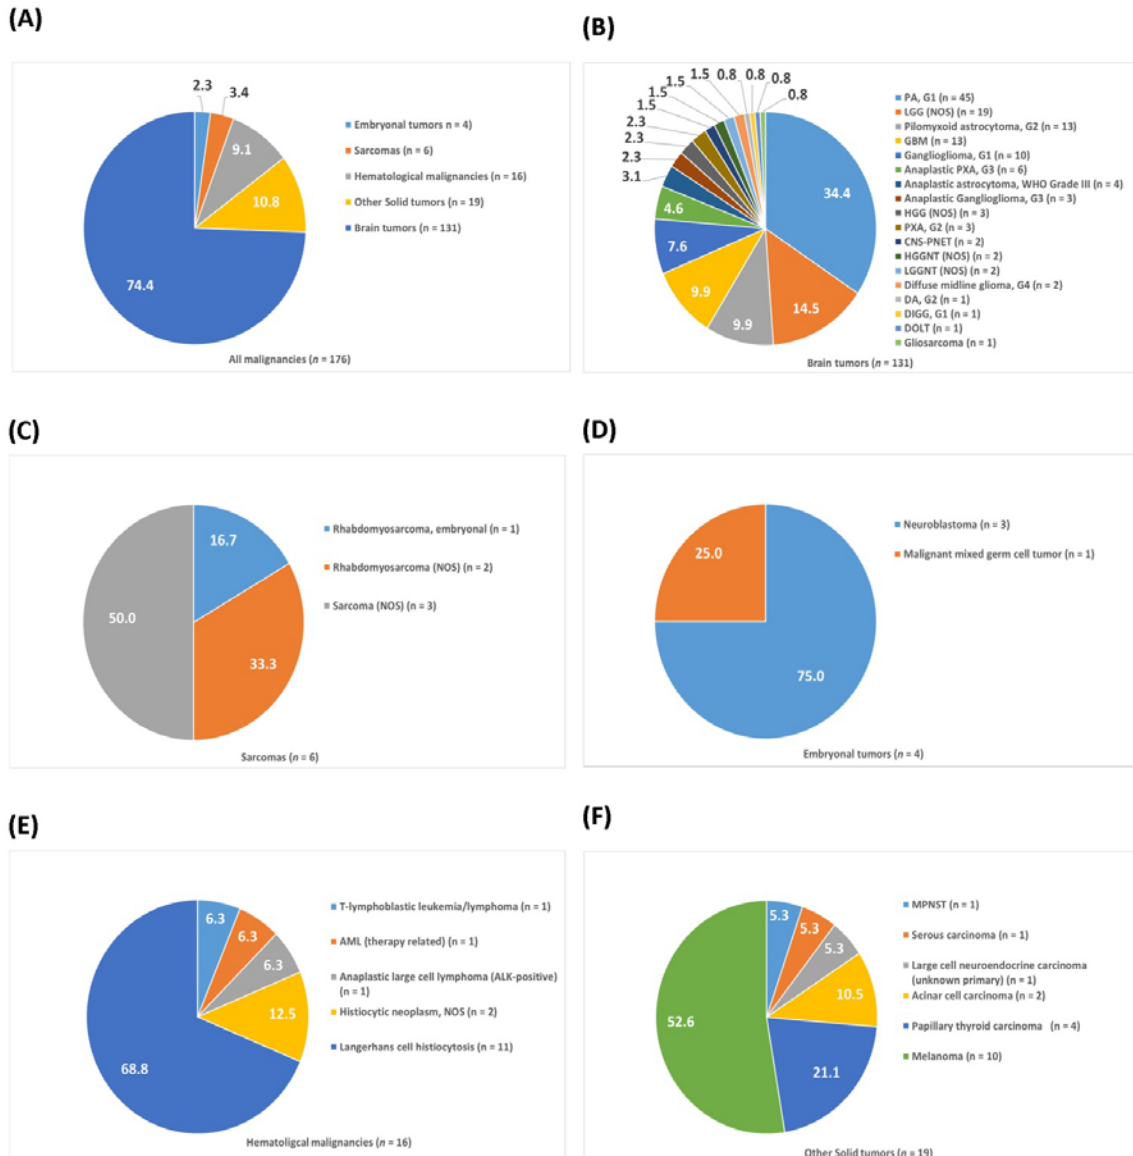

**Figure S2.** Distribution of cancer types with known-activating *BRAF* alteration. **(A)** Samples were grouped into one of five major categories. Each major category was subsequently divided into multiple subcategories pertaining to diagnosis. **(B)** Brain tumors contained 18 subtypes, **(C)** Sarcomas contained 3 subtypes, **(D)** Embryonal tumors contained 2 subtypes, **(E)** Hematological malignancies contained 5 subtypes, and **(F)** other solid tumors included 6 subtypes. Abbreviations: CNS-PNET, central nervous system-primitive neuroectodermal tumor; DA, diffuse astrocytoma; DIGG, desmoplastic infantile ganglioglioma; DOLT, disseminated oligodendroglial-like leptomenigeal tumor; GBM, glioblastoma; HGG, high grade glioma; HGGNT, high grade glioneuronal tumor; LGG, low-grade glioma; LGGNT, low grade glioneuronal tumor; MPNST, malignant peripheral nerve sheath tumor; NOS, not otherwise specified; PA, pilocytic astrocytoma; PXA, pleomorphic xanthoastrocytoma

(A)

Prior BRAF Testing Concordance with CGP testing

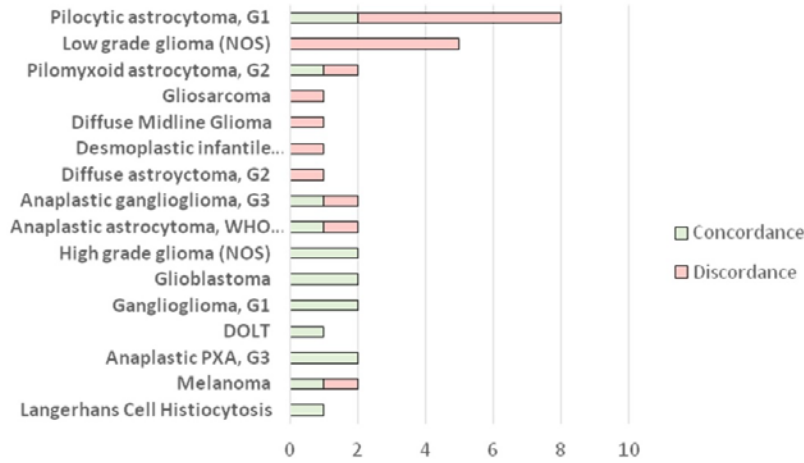

(B)

Number of patients with BRAF mutation identified with CGP

| Disease                   | Alteration identified by CGP | Prior BRAF testing methodology                    | Prior BRAF testing result                         |
|---------------------------|------------------------------|---------------------------------------------------|---------------------------------------------------|
| Pilocytic astrocytoma, G1 | KIAA1549-BRAF                | Unknown methodology for BRAF fusion and V600E     | Positive for BRAF fusion; Negative for BRAF V600E |
| Pilocytic astrocytoma, G1 | KIAA1549-BRAF                | FISH and Pyrosequencing for KIAA1549-BRAF         | Positive for BRAF fusion                          |
| Pilocytic astrocytoma, G1 | KIAA1549-BRAF                | IHC for V600E                                     | Indeterminate for BRAF V600E                      |
| Pilocytic astrocytoma, G1 | KIAA1549-BRAF                | IHC for V600E                                     | Negative for BRAF V600E                           |
| Pilocytic astrocytoma, G1 | KIAA1549-BRAF                | PCR for V600E                                     | Negative for BRAF V600E                           |
| Pilocytic astrocytoma, G1 | KIAA1549-BRAF                | IHC for V600E and NGS panel including BRAF        | Negative for BRAF V600E or other BRAF mutation    |
| Pilocytic astrocytoma, G1 | KIAA1549-BRAF                | IHC for V600E                                     | Negative for BRAF V600E                           |
| Pilocytic astrocytoma, G1 | QKI-RAF1                     | IHC for V600E                                     | Negative for BRAF V600E                           |
| Disease                   | Alteration identified by CGP | Prior BRAF testing methodology                    | Prior BRAF testing result                         |
| Low grade glioma (NOS)    | V600E                        | FISH for BRAF rearrangement                       | Negative for BRAF rearrangement                   |
| Low grade glioma (NOS)    | T599_V600insT                | Multigene sequencing hotspot panel including BRAF | Negative for BRAF mutation                        |
| Low grade glioma (NOS)    | V600E                        | FISH for BRAF rearrangement                       | Negative for BRAF rearrangement                   |
| Low grade glioma (NOS)    | KIAA1549-BRAF                | NGS gene panel including BRAF                     | Negative for BRAF mutation                        |
| Low grade glioma (NOS)    | KIAA1549-BRAF                | Hotspot testing for V600E                         | Negative for BRAF V600E                           |

**Figure S3.** Comparison of BRAF molecular testing results (A) Concordance/discordance of prior BRAF molecular testing with CGP across pediatric malignancy. (B) Detailed analysis of prior BRAF molecular testing in PA and LGG (NOS). Abbreviations: CGP, comprehensive genomic profiling; DOLT, disseminated oligodendroglial-like leptomeningeal tumor; NOS, not otherwise specified; PA, pilocytic astrocytoma; PXA, pleomorphic xanthoastrocytoma; WHO, world health organization.
