# Supplementary material
Source: PubMed Central journal article supplement (PMC7794197)
Supplement: ONCO-26-e153-s002.pdf [file ONCO-26-e153-s002.pdf]

Supplemental Tables for:  
Targetable BRAF and RAF1 alterations in advanced pediatric cancers  
Andrew Rankin et al.

| Patient # | Diagnosis                                             | Age (yrs) | BRAF Genomic Alteration |
|-----------|-------------------------------------------------------|-----------|-------------------------|
| 1         | T-lymphoblastic leukemia/lymphoma                     | 10        | L597Q                   |
| 2         | AML (therapy related)                                 | 14        | V600E                   |
| 3         | Anaplastic large cell lymphoma (ALK positive)         | 15        | G469V                   |
| 4         | Langerhans cell histiocytosis                         | 1         | V600E                   |
| 5         | Langerhans cell histiocytosis                         | 1         | V600E                   |
| 6         | Langerhans cell histiocytosis                         | 2         | V600E                   |
| 7         | Langerhans cell histiocytosis                         | 2         | V600E                   |
| 8         | Langerhans cell histiocytosis                         | 3         | V600E                   |
| 9         | Langerhans cell histiocytosis                         | 4         | V600E                   |
| 10        | Langerhans cell histiocytosis                         | 5         | V600E                   |
| 11        | Langerhans cell histiocytosis                         | 5         | V600E                   |
| 12        | Langerhans cell histiocytosis                         | 6         | N486_T491>K             |
| 13        | Histiocytic neoplasm, NOS                             | 12        | G469V                   |
| 14        | Langerhans cell histiocytosis                         | 13        | N486_P490del            |
| 15        | Histiocytic neoplasm, NOS                             | 16        | V600E                   |
| 16        | Langerhans cell histiocytosis                         | 19        | N486_P490del            |
| 17        | Melanoma                                              | 9         | V600K                   |
| 18        | Melanoma                                              | 14        | V600E                   |
| 19        | Melanoma                                              | 15        | V600E                   |
| 20        | Melanoma                                              | 18        | V600D                   |
| 21        | Melanoma                                              | 17        | V600E                   |
| 22        | Melanoma                                              | 19        | V600E                   |
| 23        | Melanoma                                              | 20        | V600E                   |
| 24        | Melanoma                                              | 20        | V600E                   |
| 25        | Melanoma                                              | 20        | V600E                   |
| 26        | Melanoma                                              | 20        | V600E                   |
| 27        | Papillary thyroid carcinoma                           | 13        | V600E                   |
| 28        | Papillary thyroid carcinoma                           | 17        | V600E                   |
| 29        | Papillary thyroid carcinoma                           | 17        | V600E                   |
| 30        | Papillary thyroid carcinoma                           | 18        | V600E                   |
| 31        | Neuroblastoma                                         | 7         | K501E                   |
| 32        | Neuroblastoma                                         | 8         | K501E                   |
| 33        | Neuroblastoma                                         | 8         | K501E                   |
| 34        | Rhabdomyosarcoma (NOS)                                | 7         | K501E                   |
| 35        | Rhabdomyosarcoma (NOS)                                | 12        | V600E                   |
| 36        | Rhabdomyosarcoma, embryonal                           | 4         | K1A1549-BRAF            |
| 37        | Sarcoma (NOS)                                         | 4         | K1A1549-BRAF            |
| 38        | Sarcoma (NOS)                                         | 1         | CUX1-BRAF               |
| 39        | Sarcoma (NOS)                                         | 12        | STARD3NL-BRAF           |
| 40        | Acinar cell carcinoma                                 | 7         | PPP1CC-BRAF             |
| 41        | Acinar cell carcinoma                                 | 15        | V600E                   |
| 42        | MPNST                                                 | 10        | K1A1549-BRAF            |
| 43        | Large cell neuroendocrine carcinoma (unknown primary) | 13        | KHDR852-BRAF            |
| 44        | Malignant mixed germ cell tumor                       | 20        | N581S                   |
| 45        | Serous carcinoma                                      | 18        | V600E                   |

**Table S1.** Hematologic malignancies and extracranial solid tumors with known-activating *BRAF* alteration

| Patient # | Diagnosis                             | Age (yrs) | BRAF Genomic Alteration |
|-----------|---------------------------------------|-----------|-------------------------|
| 46        | PXA, G2                               | 6         | V600E                   |
| 47        | PXA, G2                               | 15        | V600E                   |
| 48        | PXA, G2                               | 16        | V600E                   |
| 49        | Anaplastic PXA, G3                    | 6         | V600E                   |
| 50        | Anaplastic PXA, G3                    | 10        | V600E                   |
| 51        | Anaplastic PXA, G3                    | 14        | V600E                   |
| 52        | Anaplastic PXA, G3                    | 17        | V600E                   |
| 53        | Anaplastic PXA, G3                    | 20        | V600E                   |
| 54        | PA, G1                                | 5         | V600E                   |
| 55        | PA, G1                                | 11        | V600E                   |
| 56        | PA, G1                                | 12        | V600E                   |
| 57        | PA, G1                                | 18        | V600E                   |
| 58        | PA, G1                                | 18        | V600E                   |
| 59        | PA, G1                                | 20        | V600E                   |
| 60        | PA, G1                                | 21        | V600E                   |
| 61        | Pilomyxoid astrocytoma, G2            | 5         | V600E                   |
| 62        | Pilomyxoid astrocytoma, G2            | 7         | V600E                   |
| 63        | Pilomyxoid astrocytoma, G2            | 11        | V600E                   |
| 64        | Pilomyxoid astrocytoma, G2            | 16        | V600E                   |
| 65        | Anaplastic astrocytoma, WHO Grade III | 7         | V600E                   |
| 66        | Anaplastic astrocytoma, WHO Grade III | 16        | V600E                   |
| 67        | Ganglioglioma, G1                     | 5         | V600E                   |
| 68        | Ganglioglioma, G1                     | 5         | V600E                   |
| 69        | Ganglioglioma, G1                     | 5         | V600E                   |
| 70        | Ganglioglioma, G1                     | 7         | V600E                   |
| 71        | Ganglioglioma, G1                     | 9         | V600E                   |
| 72        | Ganglioglioma, G1                     | 10        | V600E                   |
| 73        | Ganglioglioma, G1                     | 11        | V600E + N581S           |
| 74        | Ganglioglioma, G1                     | 15        | V600E                   |
| 75        | Ganglioglioma, G1                     | 17        | V600E                   |
| 76        | Ganglioglioma, G1                     | 21        | V600E                   |
| 77        | Anaplastic Ganglioglioma, G3          | 13        | V600E                   |
| 78        | Anaplastic Ganglioglioma, G3          | 15        | V600E+D594G             |
| 79        | GBM                                   | 1         | V600E                   |
| 80        | GBM                                   | 7         | V600E                   |
| 81        | GBM                                   | 9         | V600E                   |
| 82        | GBM                                   | 11        | N486_T491>K             |
| 83        | GBM                                   | 12        | V600E                   |
| 84        | GBM                                   | 13        | V600E                   |
| 85        | GBM                                   | 14        | V600E                   |
| 86        | GBM                                   | 14        | V600E                   |
| 87        | GBM                                   | 15        | V600E                   |
| 88        | GBM                                   | 16        | V600E+D594G             |
| 89        | GBM                                   | 16        | V600E                   |
| 90        | GBM                                   | 20        | V600E                   |
| 91        | GBM                                   | 20        | V600E                   |
| 92        | LGG (NOS)                             | 2         | V600E                   |
| 93        | LGG (NOS)                             | 2         | V600E                   |
| 94        | LGG (NOS)                             | 5         | V600E                   |
| 95        | LGG (NOS)                             | 5         | V600E                   |
| 96        | LGG (NOS)                             | 6         | V600E                   |
| 97        | LGG (NOS)                             | 10        | T599_V600insT           |
| 98        | LGG (NOS)                             | 12        | V600E                   |
| 99        | LGG (NOS)                             | 14        | V600E                   |
| 100       | LGG (NOS)                             | 16        | A598_T599insT           |
| 101       | LGG (NOS)                             | 18        | V600E                   |
| 102       | LGG (NOS)                             | 18        | V600E                   |
| 103       | LGG (NOS)                             | 21        | V600E                   |
| 104       | HGG (NOS)                             | 7         | V600E                   |
| 105       | HGG (NOS)                             | 20        | V600E                   |
| 106       | HGGNT (NOS)                           | 8         | N581S                   |
| 107       | HGGNT (NOS)                           | 19        | V600E                   |
| 108       | LGGNT (NOS)                           | 12        | V600E                   |
| 109       | Diffuse midline glioma, G4            | 13        | V600E                   |
| 110       | Diffuse midline glioma, G4            | 15        | V600E                   |
| 111       | Gliosarcoma                           | 6         | V600E                   |

**Table S2.** Primary brain tumors with known-activating *BRAF* SV or Indels

| Patient # | Diagnosis                             | Age (yrs) | BRAF Genomic Alteration |
|-----------|---------------------------------------|-----------|-------------------------|
| 112       | PA, G1                                | 1         | KIAA1549-BRAF           |
| 113       | PA, G1                                | 2         | KIAA1549-BRAF           |
| 114       | PA, G1                                | 2         | KIAA1549-BRAF           |
| 115       | PA, G1                                | 2         | KIAA1549-BRAF           |
| 116       | PA, G1                                | 2         | KIAA1549-BRAF           |
| 117       | PA, G1                                | 3         | KIAA1549-BRAF           |
| 118       | PA, G1                                | 4         | KIAA1549-BRAF           |
| 119       | PA, G1                                | 4         | KIAA1549-BRAF           |
| 120       | PA, G1                                | 5         | KIAA1549-BRAF           |
| 121       | PA, G1                                | 5         | KIAA1549-BRAF           |
| 122       | PA, G1                                | 5         | KIAA1549-BRAF           |
| 123       | PA, G1                                | 5         | KIAA1549-BRAF           |
| 124       | PA, G1                                | 5         | KIAA1549-BRAF           |
| 125       | PA, G1                                | 6         | KIAA1549-BRAF           |
| 126       | PA, G1                                | 6         | FAM131B-BRAF            |
| 127       | PA, G1                                | 6         | KIAA1549-BRAF           |
| 128       | PA, G1                                | 6         | KIAA1549-BRAF           |
| 129       | PA, G1                                | 7         | KIAA1549-BRAF           |
| 130       | PA, G1                                | 7         | KIAA1549-BRAF           |
| 131       | PA, G1                                | 7         | KIAA1549-BRAF           |
| 132       | PA, G1                                | 8         | KIAA1549-BRAF           |
| 133       | PA, G1                                | 8         | KIAA1549-BRAF           |
| 134       | PA, G1                                | 8         | KIAA1549-BRAF           |
| 135       | PA, G1                                | 8         | KIAA1549-BRAF           |
| 136       | PA, G1                                | 9         | KIAA1549-BRAF           |
| 137       | PA, G1                                | 9         | KIAA1549-BRAF           |
| 138       | PA, G1                                | 12        | KIAA1549-BRAF           |
| 139       | PA, G1                                | 13        | KIAA1549-BRAF           |
| 140       | PA, G1                                | 13        | KIAA1549-BRAF           |
| 141       | PA, G1                                | 13        | KIAA1549-BRAF           |
| 142       | PA, G1                                | 14        | KIAA1549-BRAF           |
| 143       | PA, G1                                | 14        | KIAA1549-BRAF           |
| 144       | PA, G1                                | 14        | KIAA1549-BRAF           |
| 145       | PA, G1                                | 17        | KIAA1549-BRAF           |
| 146       | PA, G1                                | 17        | KIAA1549-BRAF           |
| 147       | PA, G1                                | 18        | KIAA1549-BRAF           |
| 148       | PA, G1                                | 18        | BCAS1-BRAF              |
| 149       | PA, G1                                | 20        | KIAA1549-BRAF           |
| 150       | Pilomyxoid astrocytoma, G2            | 1         | KIAA1549-BRAF           |
| 151       | Pilomyxoid astrocytoma, G2            | 1         | KIAA1549-BRAF           |
| 152       | Pilomyxoid astrocytoma, G2            | 1         | KIAA1549-BRAF           |
| 153       | Pilomyxoid astrocytoma, G2            | 1         | KIAA1549-BRAF           |
| 154       | Pilomyxoid astrocytoma, G2            | 1         | KIAA1549-BRAF           |
| 155       | Pilomyxoid astrocytoma, G2            | 3         | KIAA1549-BRAF           |
| 156       | Pilomyxoid astrocytoma, G2            | 5         | KIAA1549-BRAF           |
| 157       | Pilomyxoid astrocytoma, G2            | 5         | KIAA1549-BRAF           |
| 158       | Pilomyxoid astrocytoma, G2            | 8         | KIAA1549-BRAF           |
| 159       | Anaplastic astrocytoma, WHO Grade III | <1        | KIAA1549-BRAF           |
| 160       | Anaplastic astrocytoma, WHO Grade III | 20        | KIAA1549-BRAF           |
| 161       | Anaplastic PXA, G3                    | 1         | CCDC6-BRAF              |
| 162       | Anaplastic Ganglioglioma, G3          | 10        | TMEM106B-BRAF           |
| 163       | LGG (NOS)                             | 3         | KIAA1549-BRAF           |
| 164       | LGG (NOS)                             | 3         | KIAA1549-BRAF           |
| 165       | LGG (NOS)                             | 3         | KIAA1549-BRAF           |
| 166       | LGG (NOS)                             | 8         | KIAA1549-BRAF           |
| 167       | LGG (NOS)                             | 8         | KIAA1549-BRAF           |
| 168       | LGG (NOS)                             | 9         | KIAA1549-BRAF           |
| 169       | LGG (NOS)                             | 18        | KIAA1549-BRAF           |
| 170       | HGG (NOS)                             | 15        | KIAA1549-BRAF           |
| 171       | LGGNT (NOS)                           | 1         | KIAA1549-BRAF           |
| 172       | DA, G2                                | 4         | KIAA1549-BRAF           |
| 173       | DOLT                                  | 19        | KIAA1549-BRAF           |
| 174       | DIGG, G1                              | 3         | KIAA1549-BRAF           |
| 175       | CNS-PNET                              | 12        | KIAA1549-BRAF           |
| 176       | CNS-PNET                              | 16        | KIAA1549-BRAF           |

**Table S3.** Primary brain tumors with known-activating *BRAF* fusion
